# Supplementary material
Source: publisher figshare collection journal article supplement (https://tandf.figshare.com/ndownloader/files/18233330)
Supplement: Supplementary file 1 [file 18233330]

**Supplementary Material**

*Validation of the Stimuli*

The stimuli used in this study was validated in a pretest (N=16) in which a separate set of participants were asked to evaluate the valence, arousal and congruency. Each image and audio was rated on two separate dimensions: pleasantness and arousal. The scale ranged from 0 ‘not at all’ to 100 ‘extremely’. To examine whether there were any differences in arousal and pleasantness between our pleasant and unpleasant stimuli, each of the four stimuli per condition (pleasant: applause, party, baby laughing, seagulls; and unpleasant: attack, dentist drill, baby crying, bees) were averaged, yielding a total score of pleasantness and arousal for the following categories: pleasant audio, unpleasant audio, pleasant image, unpleasant image.

As expected, participants rated as more pleasant the pleasant vs. unpleasant pictures (*M=*73.98, *SD=*12.87; *M=*25.43 *SD=*10.61, p<.001) and sounds (*M=*72.73, *SD*=15.43; *M=*12.06, *SD=*8.23, *p<.*001). Moreover there was no difference in arousal between the pleasant and unpleasant pictures (*M=*46.56, *SD=*31.71; *M=*31.41, *SD=*23.07, p=.056) or sounds (*M=*43.90, *SD=*28.19; *M=*30.16, *SD=*24.77, *p=.*106).

Finally, participants were presented simultaneously each paired image and sound for 3 seconds. After each trial, participants were asked to rate the congruency between each sound and the image (i.e., “how well does the image depict the sound?’) using a scale ranging from 0 ‘not at all’ to 10 ‘extremely’. Across participants, these ratings ranged from 8 to 10 indicating a good congruency between the audio-visual stimuli (see Figure below).

*Baseline ratings collected from the Behavioral Experiment*

Similar to the validation of the stimuli described above, we also collected baseline pleasantness and arousal ratings from the participants that completed the AV-EEB task in the lab. As expected and similar to the results presented above, participants rated as more pleasant the pleasant vs. unpleasant pictures (*M=*73.63, *SD=*15.52; *M=*25.43, *SD=*12.57, p<.001) and sounds (*M=*73.60, *SD*=15.08; *M=*17.64, *SD=*10.19, *p<.*001). Moreover there was no difference in arousal between the pleasant and unpleasant pictures (*M=*47.06, *SD=*23.48; *M=*34.25 *SD=*27.36, *p=.*67) or sounds (*M=*51.50, *SD=*22.97; *M=*48.19, *SD=*28.08, *p=.*56).

*Non-parametric tests on the presence of EEB*

We also conducted non-parametric tests (i.e., Wilcoxon Signed Rank) on the emotional judgements to assess the robustness of the EEB effect on our data. Similar to our analyses using parametric tests, we found a larger difference between incongruent and congruent other-related judgements than for self-related judgements in all three experiments, *p*’s<.012. Given the same pattern of results as that observed with parametric tests, this further highlights the robustness of this EEB effect.

*Is there a difference in the computed EEB scores across the behavioral and online experiments?*

To examine whether there is a difference between the computed EEB scores across our three studies, we conducted independent sample t-tests. The difference in EEB between the behavioral lab-based study (M= 2.82, SD = 4.63) and the first online study (M=1.30, SD = 3.26) was not statistically significant, p=0.157. Similarly, there was no difference in EEB between the first and second online study (M= .84, SD =2.05), p=0.376. However, we observed higher EEB scores in the behavioral lab-based study vs. the second online study, p=.002.

*Relationship between EEB and Alexythimia subscales*

Even though alexithymia subscales correlated with each other (all p’s<.004), no association was observed between EEB scores and DDF, *r*(90)=.05, p=.608, DIF, *r*(90)=.00, p=.980, and EOT, *r*(90)=.04, p=.718.

*Multiple Linear Regression on the EEB scores with the SRQ subscales as predictors*

As shown in the figure below, social negative potency remains a significant predictor of EEB, b=.62, SE=.26, P=.017, when including all the other subscales of the SRQ in our model (F(6,84)=1.33, p=.251, R2=.087). All other predictors (admiration, passivity, prosocial interactions, sexual relationships, sociability) were n.s.


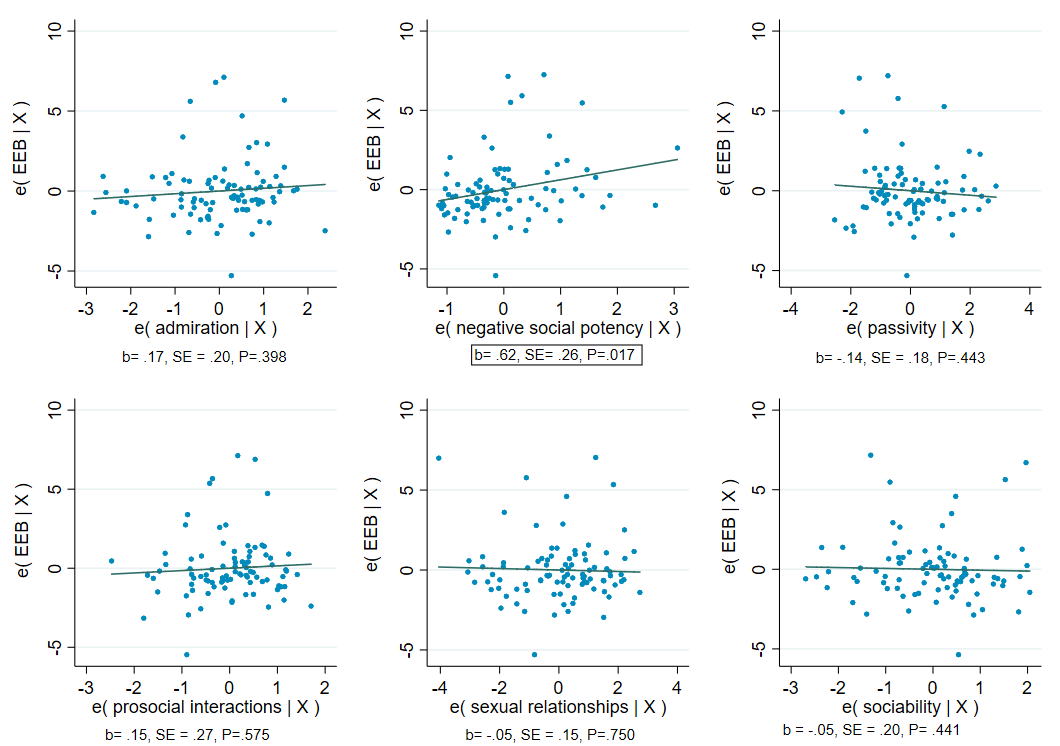


*Relationship between Alexithymia and emotional judgements*

To examine the relationship between alexithymia and judged emotional intensity, beyond EEB, we calculated the scores for emotional judgements in response to unpleasant and pleasant conditions, as well as their average, and examined these in relation to alexythimia (TAS total score). Averaging across target, we found that the higher the alexithymia the less the “emotional intensity” reported by the participants. This was the case for both (A) unpleasant, r(90)=.21, p=.046, and (B) pleasant stimuli, r(90)=-.22, p=.037, as well as their (C) average, r(90)=-.26, p=.013 (note that unpleasant ratings were inverted for the latter).


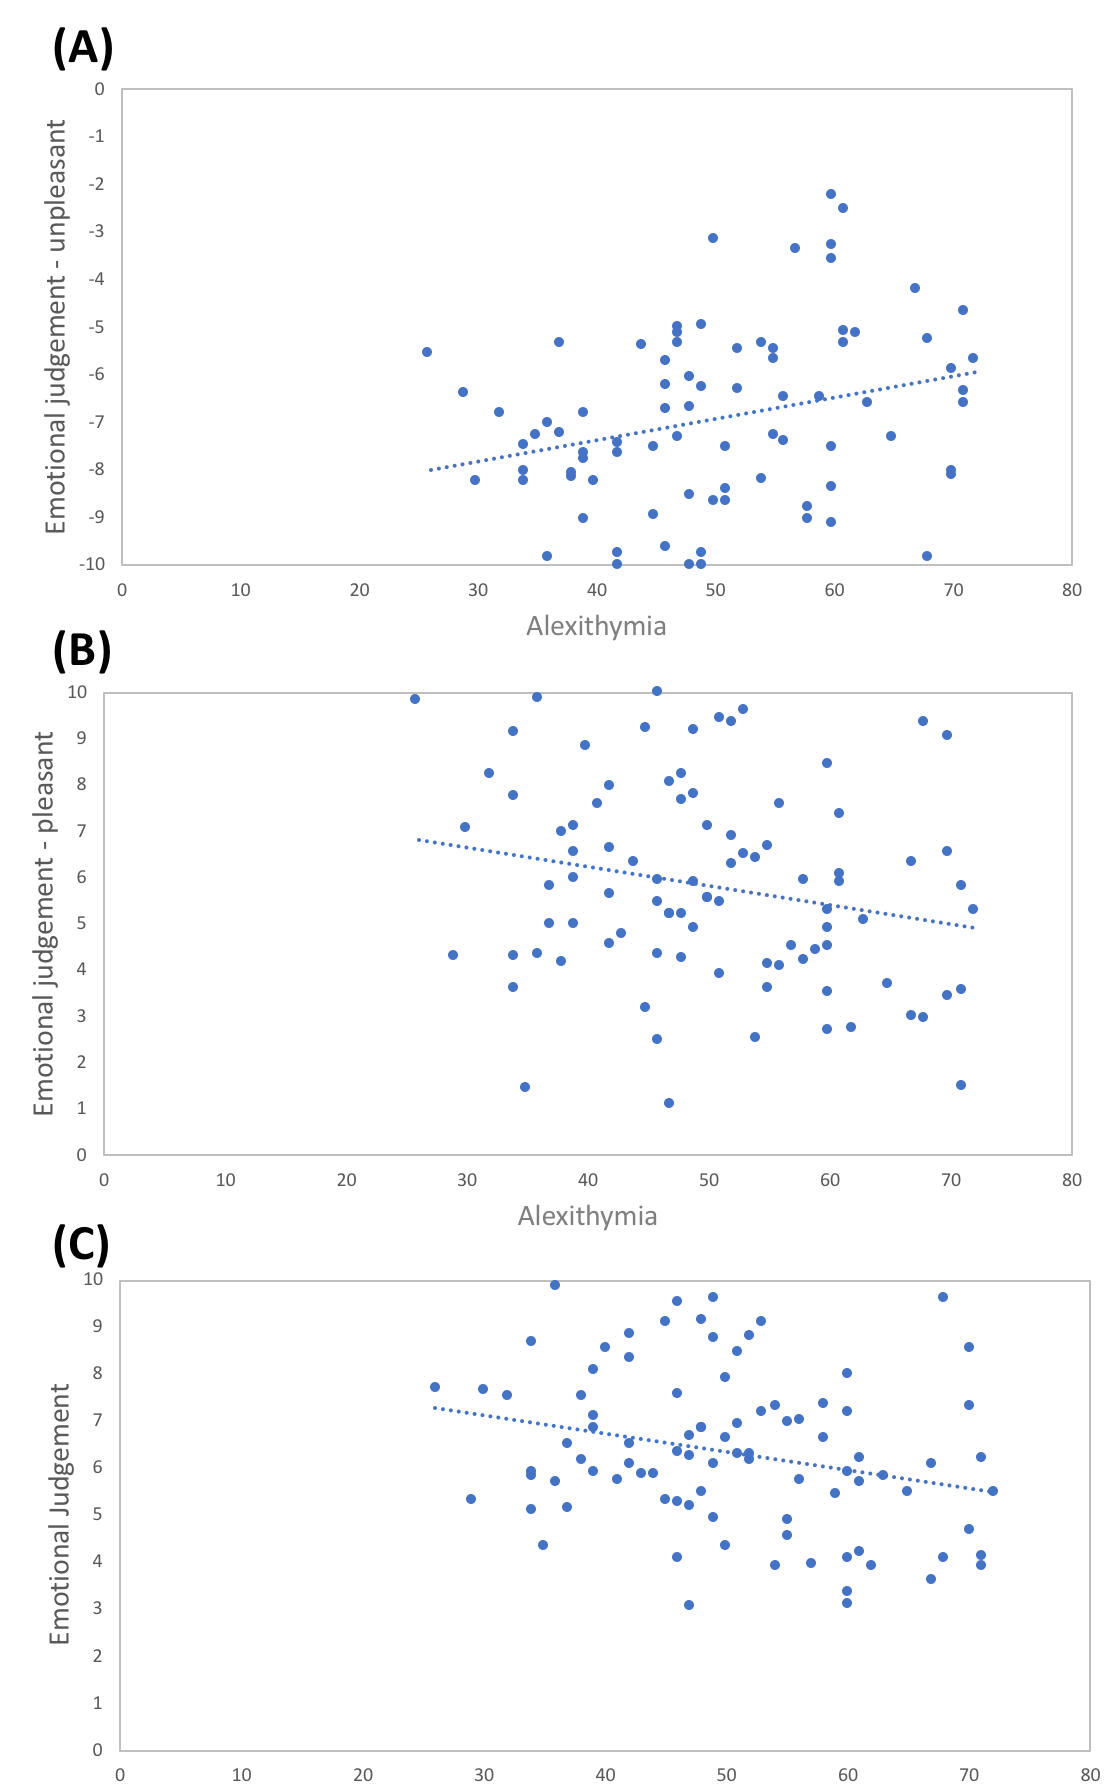


*Meta-analyses across EEB paradigms*

To determine the overall evidence that the Behavioral AV-EEB, visuo-tactile classic EEB (Silani et al., 2013) and visuogustatory EEB (Hoffman et al.., 2015)we conducted a fixed-effects meta-analysis using the metaphor package (Viechtbauer, 2010) for R software. Across the three experiments, we calculated the overall effect size (beta coefficient) for the Congruency x Target interaction reported in the respective ANOVAs (we further calculated the standard error of each effect size by extracting their 95% CIs, and their SD using the following formula: ((CI/2)/TINV(0.05,n-1)*SQRT(n)). A forest plot presenting the result of this analysis is shown below. Across the three experiments, we found evidence for the effect of EEB, with a mean estimated effect size of 0.14, *CI: [0.06– 0.23], z = 3.46, p < 0.001.The Q statistic was calculated to examine whether effect sizes across experiments were homogenous (i.e., whether both studies produced a statistically equitable effect size for the comparison of the effect of EEB) and heterogeneity was detected: Q(2) = 7.57, p = 0.023, indicating that the difference between experiments was larger than would be expected from a sampling error, i.e. chance alone.”*

*
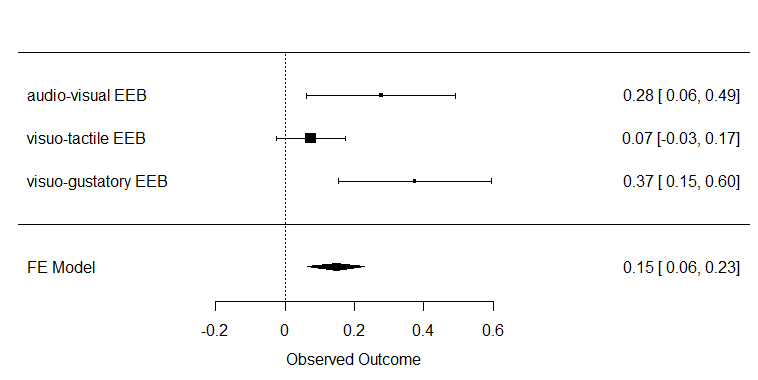
*
